# Supplementary material for: Investigation of Fe2+-incorporating organic–inorganic hybrid perovskites from first principles and experiments
Source: Royal Society of Chemistry journal article supplement (doi:10.1039/c7ra11514h), 2017-01-01
Supplement: c7ra11514h1.pdf [file c7ra11514h1.pdf]

## Supporting Information for

### **Investigation of Fe<sup>2+</sup> incorporated organic-inorganic hybrid perovskites from first principles and experiments**

Long Zhou, Jingjing Chang,\* Zhenhua Lin, Chunfu Zhang,\* Dazheng Chen, Jincheng Zhang, Yue Hao\*

† State Key Discipline Laboratory of Wide Band Gap Semiconductor Technology, Shaanxi Joint Key Laboratory of Graphene, School of Microelectronics, Xidian University, 2 South Taibai Road, Xi'an, China 710071.

#### AUTHOR INFORMATION

Corresponding Author

E-mail: jjingchang@xidian.edu.cn; cfzhang@xidian.edu.cn; yhao@xidian.edu.cn

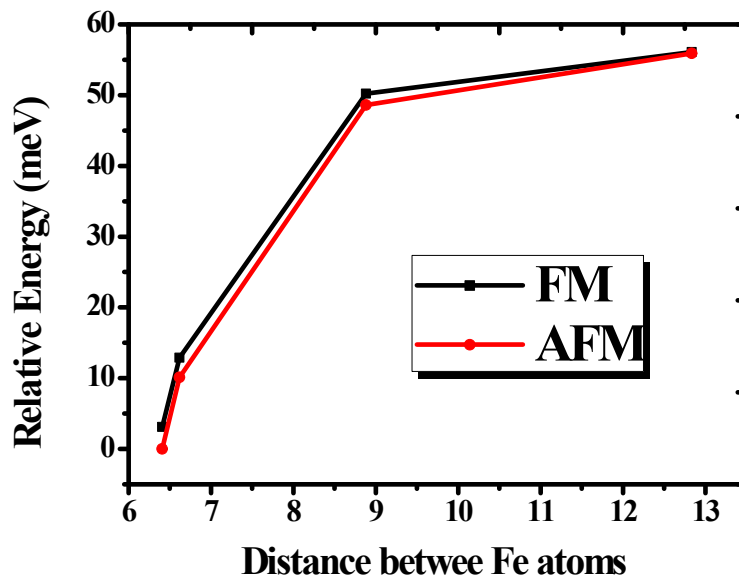

Figure S1. Relative energies of four different configurations as the pair distance changes for both AFM and FM phases. The total energy of configuration I under AFM state is set to zero as a reference.

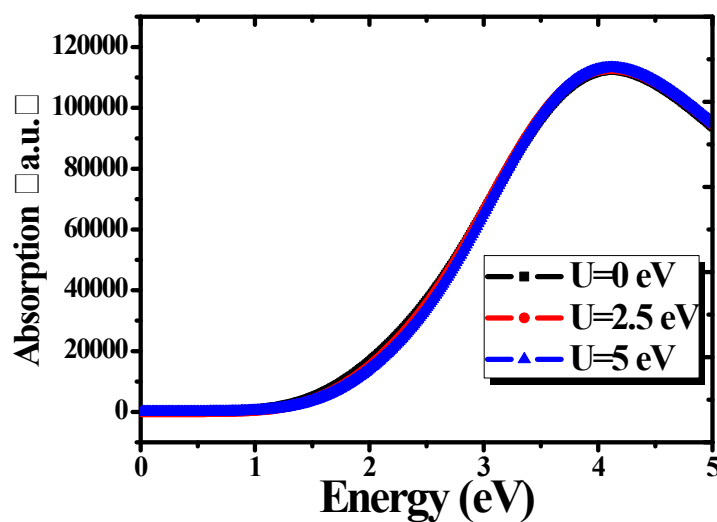

Figure S2. Intensity of the absorption with DFT+ $U$  ( $U=0, 2.5, 5$  eV).

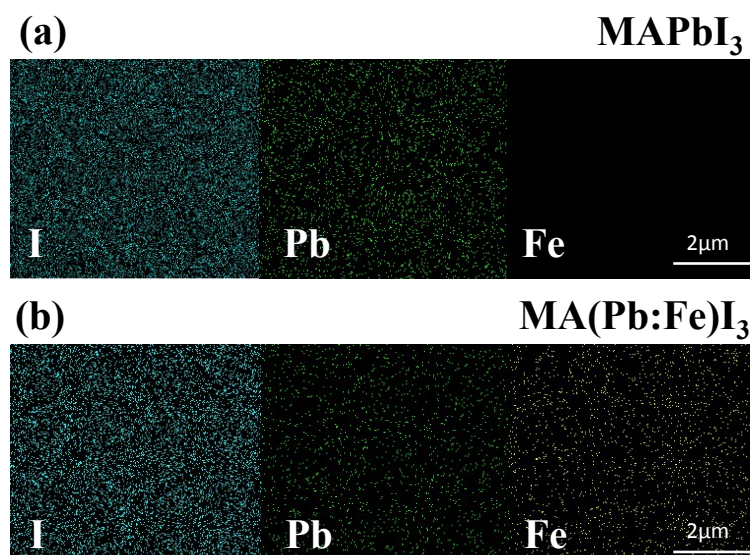

Figure S3. EDX elemental mapping of (a) MAPbI<sub>3</sub> and (b) MA(Pb:Fe)I<sub>3</sub>.

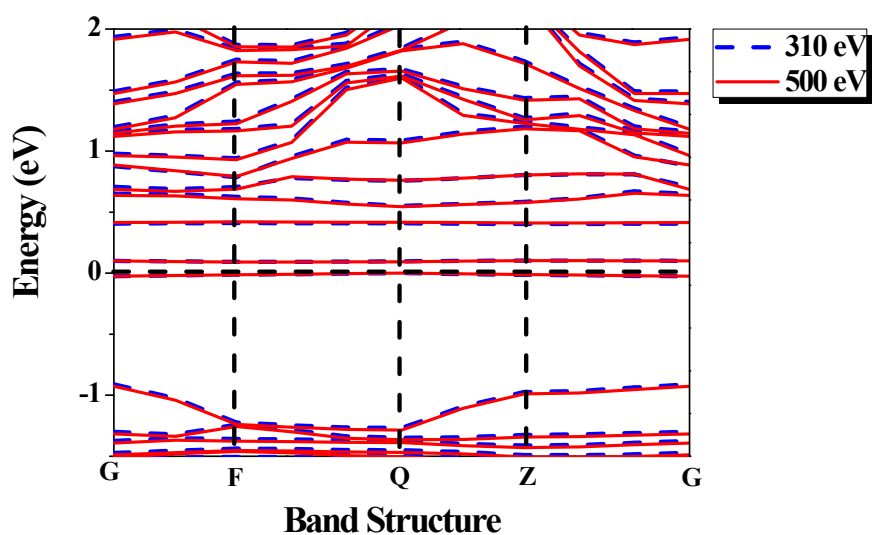

Figure S4. Band structure based on the cutoff with 310 eV and 500 eV with 12.5 at.% Fe doped perovskite.

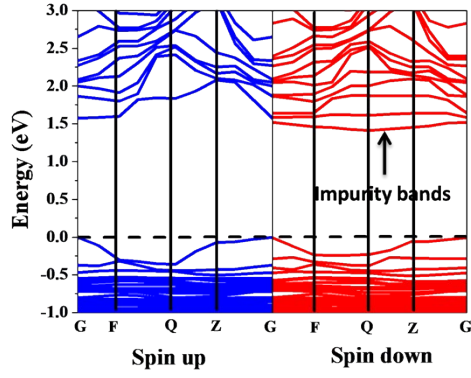

**U=2.5 eV band strucutre**

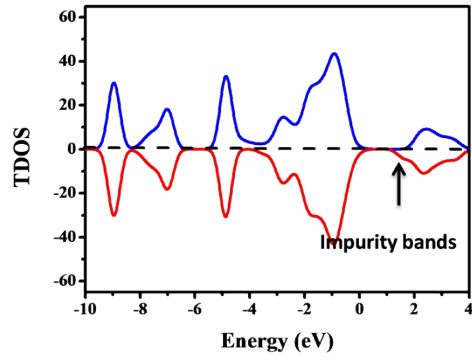

**U=2.5 eV DOS**

Figure S5. Band structure and DOS of the 12.5 at.% Fe doped perovskite with DFT+U ( $U=2.5$  eV).

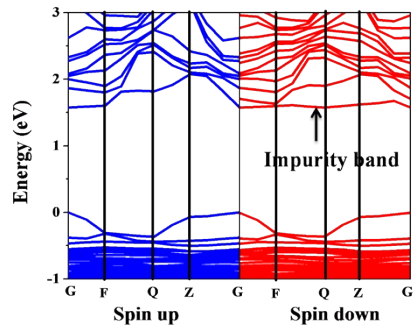

**U=5 eV Band strucutre**

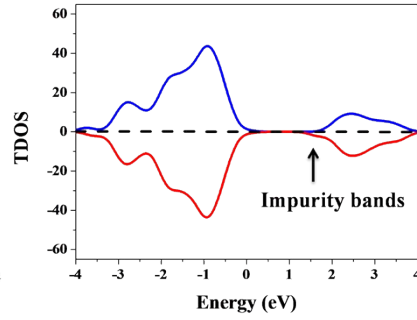

**U=5 eV DOS**

Figure S6. Band structure and DOS of the 12.5 at.% Fe doped perovskite with DFT+U ( $U=5$  eV).
